# Supplementary material
Source: PubMed Central journal article supplement (PMC6731176)
Supplement: mmc1.pdf [file mmc1.pdf]

YMTHE, Volume 27

## **Supplemental Information**

### **MicroRNA-1251-5p Promotes Carcinogenesis and Autophagy via Targeting the Tumor Suppressor TBCC in Ovarian Cancer Cells**

**Yang Shao, Xiaomin Liu, Jiao Meng, Xiaofei Zhang, Zhongliang Ma, and Gong Yang**

**Table S1 Primers & shRNA sequences**

| Primer Name                       | Primer Sequences                                                                                                                                   |
|-----------------------------------|----------------------------------------------------------------------------------------------------------------------------------------------------|
| miR-1251-5p overexpression primer | Forward: CGGGATCCAACCTCCACCCGAGCGTCCAT<br>Reverse: CCGCTCGAGAAGGCAGGCATCTTAACCAC                                                                   |
| miR-1251-5p qRT-PCR primer        | Forward: ACTCTAGCUGCCAAAGGCGCT                                                                                                                     |
| TBCC WT 3'-UTR                    | Forward: GCTCTAGATGTTCTTCACTCCTACCAAATA<br>Reverse: CGGAATTCGAGTAAGACTCAGTCTCAAAGG                                                                 |
| TBCC mut 3'-UTR                   | Forward: GCCAACACATTGTAATGGGCTCCTACTTGTAATTT<br>Reverse: CCATTACAATGTGTTGGCTTAAAATGCTGAAAACATACACAGTG                                              |
| TBCC qRT-PCR primer               | Forward: CCCCAGCAGTTGAAAGCATA<br>Reverse: TGGGATTTCCATACAGTCTGACC                                                                                  |
| TBCC shRNA-1                      | Forward: CCGGGGAAGTTGAAAGGCGGAAACACTCGAGTGTTTCCGCCT<br>TTCAACTTCCTTTTTG<br>Reverse: AATTCAAAAAGGAAGTTGAAAGGCGGAAACACTCGAGTGTTT<br>CCGCCTTTCAACTTCC |
| TBCC shRNA-2                      | Forward: CCGGGGCTGCAGAACTAATCAACGCTCGAGCGTTGATTAGTT<br>TCTGCAGCCTTTTTG<br>Reverse: AATTCAAAAAGGCTGCAGAACTAATCAACGCTCGAGCGTTGA<br>TTAGTTTCTGCAGCC   |
| TBCC shRNA-3                      | Forward: CCGGGAGGAGCGAAATATCCAGTGGCTCGAGCCACTGGATATT<br>TCGCTCCTCTTTTTG<br>Reverse: AATTCAAAAAGAGGAGCGAAATATCCAGTGGCTCGAGCCACTG<br>GATATTCGCTCCTC  |
| TBCC overexpression primer        | Forward: GCTCTAGAATGGAGTCCGTCAGTTGCT<br>Reverse: CGGAATTCTTAGTCCCCTGGATATTTTCGC                                                                    |
| LC3B qRT-PCR primer               | Forward: GATGTCCGACTTATTCGAGAGC<br>Reverse: TTGAGCTGTAAGCGCCTTCTA                                                                                  |
| p62 qRT-PCR primer                | Forward: AAGCCGGGTGGGAATGTTG<br>Reverse: CCTGAACAGTTATCCGACTCCAT                                                                                   |
| BECN1 qRT-PCR primer              | Forward: ACCTCAGCCGAAGACTGAAG<br>Reverse: AACAGCGTTTGTAGTTCTGACA                                                                                   |

**HEY**

**SKOV3**

**BF**

**FLU**

**BF**

**FLU**

**Scramble**

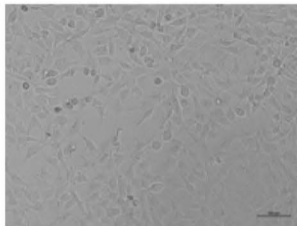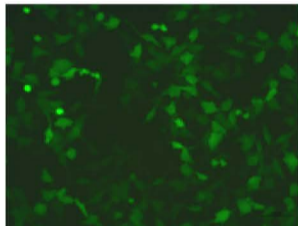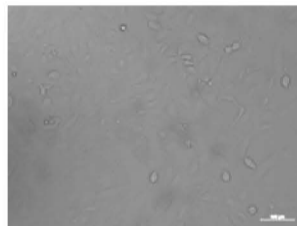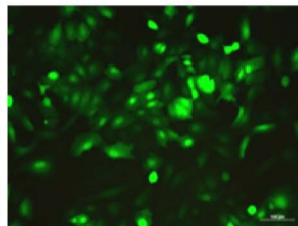

**miR-1251-5p**

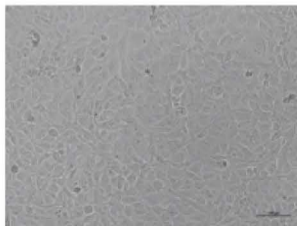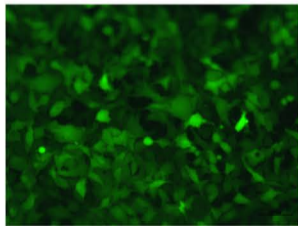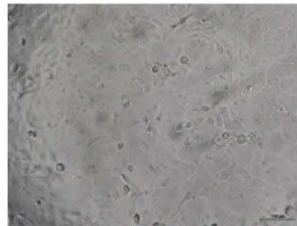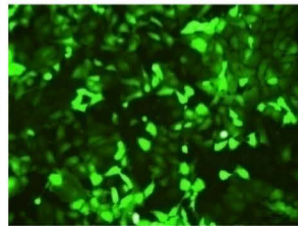

**DAPI****TBCC****LC3B****Merge**

**HEY TBCC+**  
**miR NC+**  
**8h chloroquine**

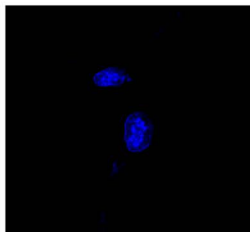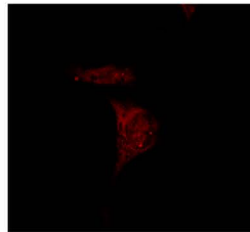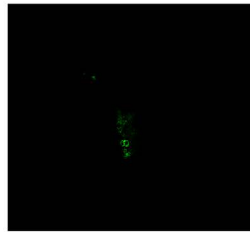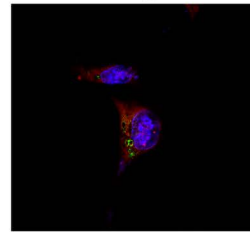

**HEY TBCC+**  
**miR-1251-5p+**  
**8h chloroquine**

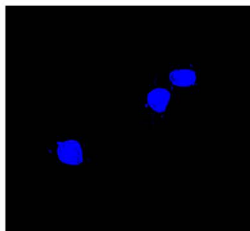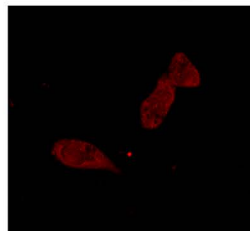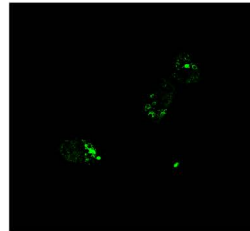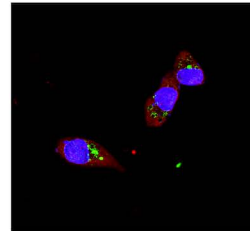

**SKOV3 TBCC+**  
**miR NC+**  
**10h chloroquine**

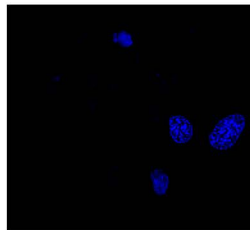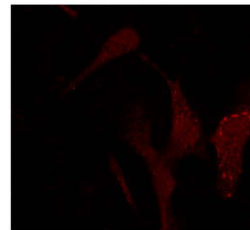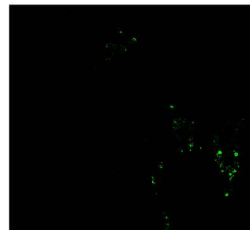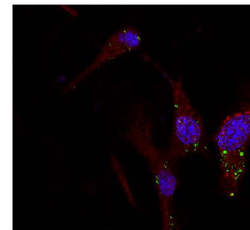

**SKOV3 TBCC+**  
**miR-1251-5p+**  
**10h chloroquine**

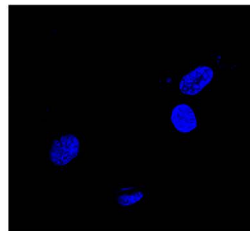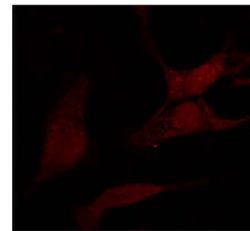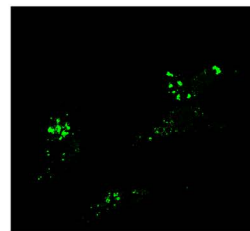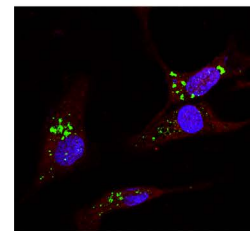

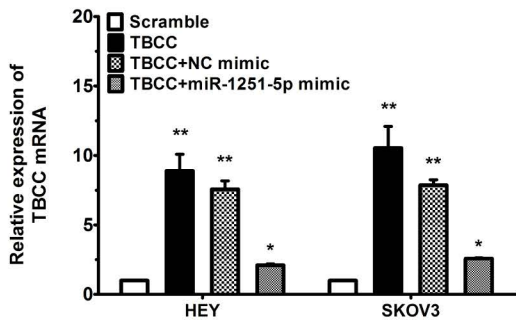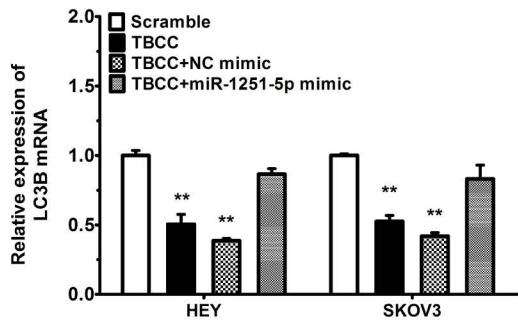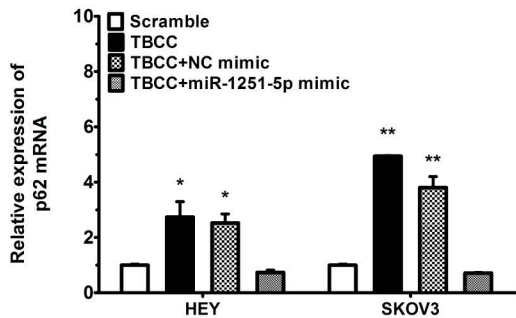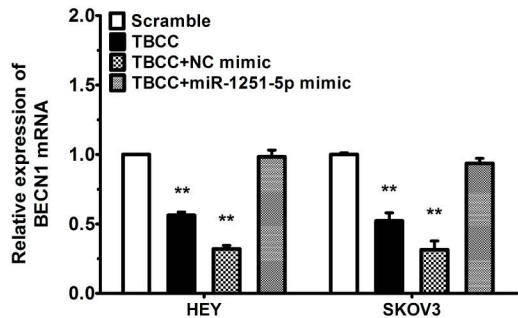

**Supplementary Table S1.** Sequences of all primers and shRNA

**Supplementary Figure S1.** Representative images of pLenti-NC and pLenti-miR-1251-5p GFP-positive HEY and SKOV3 cells are shown.

**Supplementary Figure S2.** Autophagosome formation was monitored via confocal microscope in TBCC stable expression HEY and SKOV3 cells transfected with NC or miR-1251-5p mimic treated with 25  $\mu$ M chloroquine for 8 h and 10 h respectively.

**Supplementary Figure S3.** The mRNA levels of TBCC, LC3B, p62 and BECN1 detected by using qRT-PCR.
